# Supplementary material for: RNA polymerase-promoter interactions determining different stability of the Escherichia coli and Thermus aquaticus transcription initiation complexes
Source: PubMed Central journal article supplement — Nucleic Acids Res. 2012 Oct 18;40(22):11352–62. doi: 10.1093/nar/gks973 (PMC3526302; doi:10.1093/nar/gks973), 2012-10-18
Supplement: supp_gks973_nar-01833-m-2012-File007.pdf [file supp_gks973_nar-01833-m-2012-File007.pdf]

**A**

-58      UP element                      -35 element                      -14

[ -58/-14 ]    GCTAAAATTTTTTTTAAAGTAT**TTGACA**TCAGGAAAATTTTT**TG**  
 CGATTTTAAAAAAATTTTCATA**AACTGT**AGTCCTTTTAAAA**AC**

**B**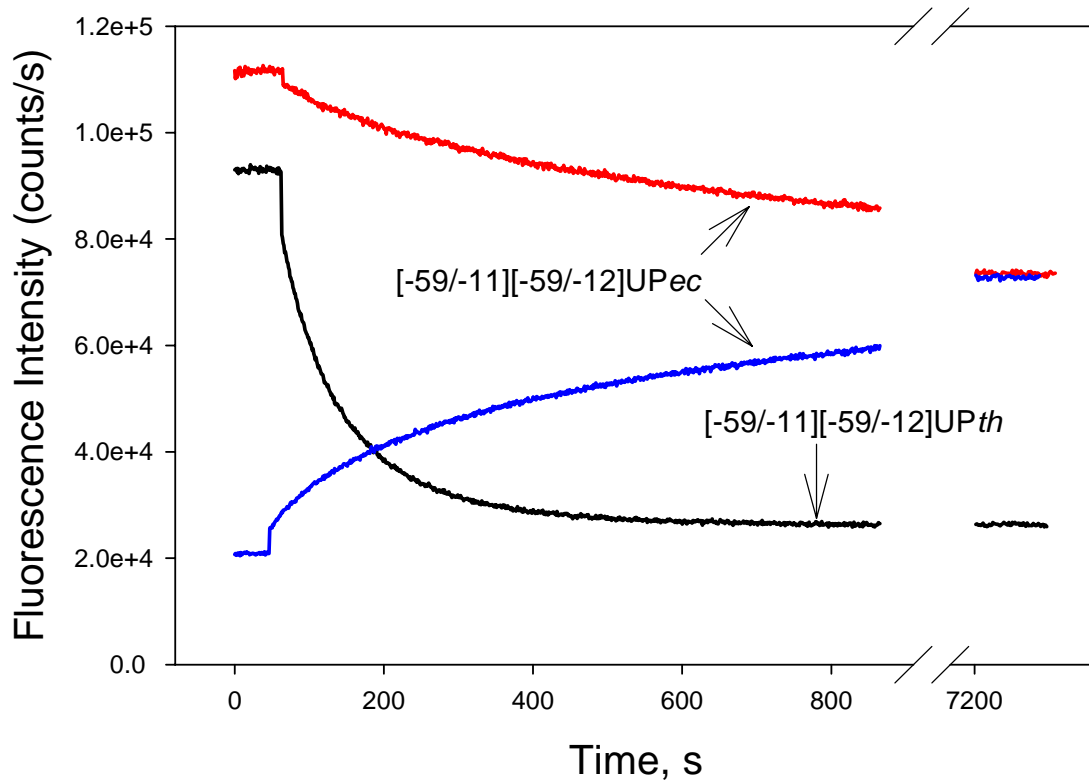

**Figure S2.** Competition binding assay for *E. coli* RNAP binding to upstream fork junction probes. (A) Sequence of a reference competitor probe [-58/-14]. (B) The panel shows the kinetics of decrease of beacon signal of *Ec*  $\sigma^{70}$  beacon complexes with fork junction probes resulted from competitive displacement of the probes by [-58/-14] upon addition of 2 nM [-58/-14] to the samples containing 1 nM *Ec*  $\sigma^{70}$  beacon and 2 nM either 12 (red curve) or 13 (black curve) probe at 25 °C. An additional order of addition experiment in which probe 12 was added to the preformed (*Ec*  $\sigma^{70}$  - [-58/-14]) complex (blue curve) was carried out to verify that competition assay for RNAP binding to probe 12 reached equilibrium.

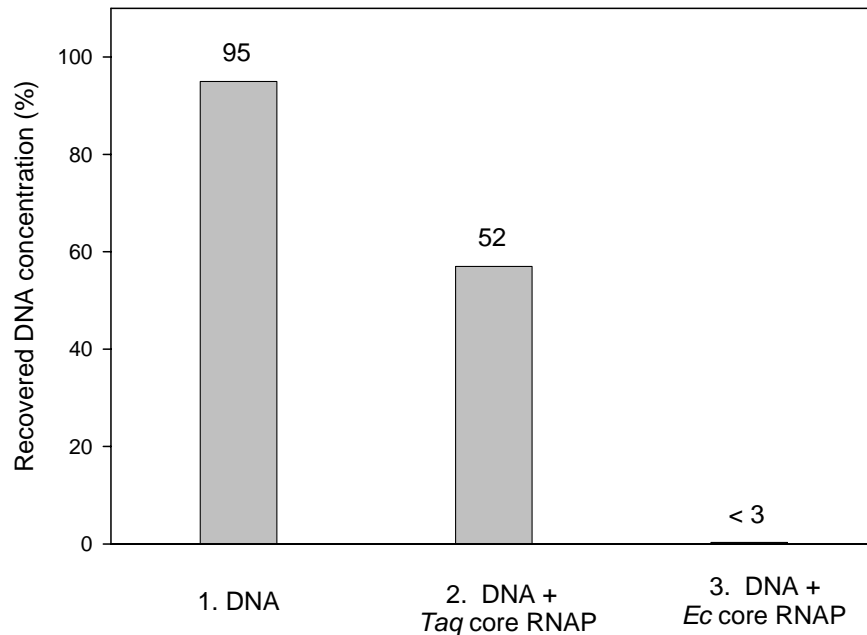

**Figure S3.** Filter binding assay for *Taq* and *E. coli* core RNAP enzymes interaction with DNA.

Samples 1-3 contained 1 nM N25cons promoter fragment in transcription buffer [40 mM Tris-HCl (pH 8.0), 100 mM NaCl, 5% glycerol, 1 mM DTT, and 10 mM MgCl<sub>2</sub>]. *Taq* or *E. coli* core RNAPs were added to samples 2 and 3, respectively; final core RNAP concentrations were 10 nM. After incubation of samples 2 and 3 for 5 min at 37° C and 50° C, respectively, the samples were passed through Micropure-EZ Enzyme Remover filter (Amicon, Inc) which removed both RNAP enzymes and RNAP-bound DNA. Relative DNA concentrations (shown in the panel) were determined using a fluorometric PicoGreen assay kit (Invitrogen). The measurements were repeated two or three times, the experimental variation of DNA recovery among replicate measurements did not exceed 15% of the average value.

**A**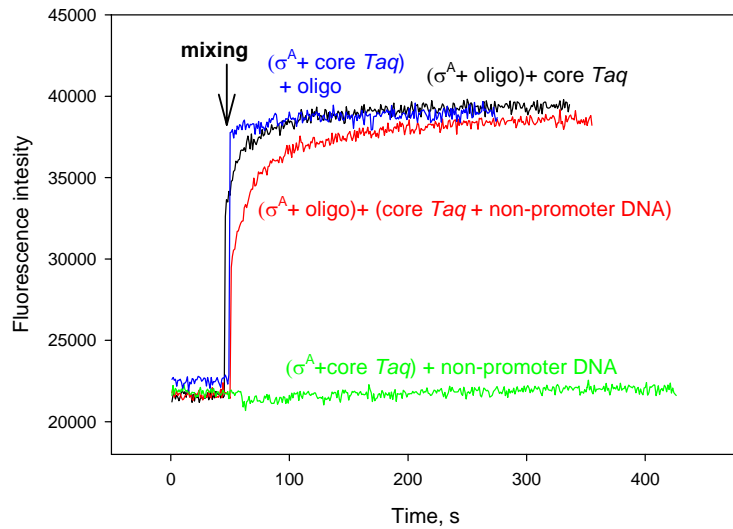**B**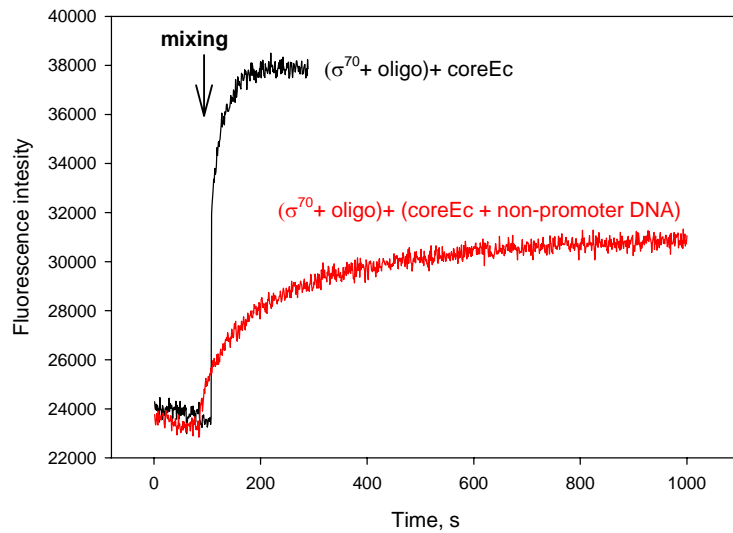**C**

-60 +30  
 CAGATAGCTCTTTTCCGTTTCCTCCGCTGCGGCCGGAATAACTCCCGGCATCGCGCCACCACTGACACGGAACAACGGCAAAACAGCCGC  
 GCGGCGTGTGTTGCCGTTGTTCCGTGTCAGTGTTGGCGCGATGCCGGGAGTTATTCCGGCCGCAGCGGAGGAAACGGAAAAGAGCTATCTG

**Figure S4.** The effect of non-promoter DNA on assembling of the *Taq* and *Ec* RNAP holoenzymes. (a) Time dependence of the fluorescence intensity upon the addition of oligo or non-promoter DNA to samples containing  $\sigma^A$  and *Taq* core RNAP (blue and green curves, respectively); time dependence of the

fluorescence intensity upon the addition of *Taq* core RNAP or *Taq* core RNAP preincubated for 5 min with non-promoter DNA to samples containing  $\sigma^A$  and oligo (black and red curves, respectively). (b) Time dependence of the fluorescence intensity upon the addition of *Ec* core RNAP or *Ec* core RNAP preincubated with non-promoter DNA to samples containing  $\sigma^{70}$  and oligo (black and red curves, respectively). (c) Shown is the sequence of non-promoter DNA probe, loosely based on the sequence of the *E. coli* *rrnB* P1 promoter.

The samples contained 1 nM labeled  $\sigma^A$  or  $\sigma^{70}$ , 400 nM -12/+2 oligo, 1.5 nM *Taq* core RNAP or *Ec* core RNAP, and 5 nM non-promoter DNA probe, final concentrations. The measurements were carried out in transcription buffer at 25° C, the mixing time was 15 s.
